# Supplementary material for: Plasma Small Extracellular Vesicle Cathepsin D Dysregulation in GRN/C9orf72 and Sporadic Frontotemporal Lobar Degeneration
Source: MDPI journal article supplement (doi:10.3390/ijms231810693), 2022-09-14
Supplement: s1 [file s1]

## Supplementary Material

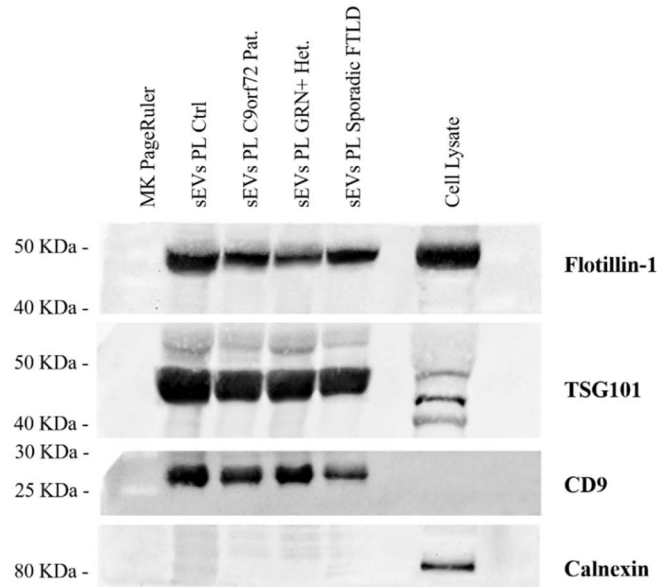

**Figure S1.** Plasma sEV characterization. Isolated plasma sEVs were CD9+ (a tetraspanin), TSG101+ and Flotillin-1+ (cytosolic proteins recovered in EVs) and Calnexin negative (endoplasmic reticulum residential protein, absent in EVs). Western Blot analysis on 4 representative samples (Ctrl, C9orf72 Pat., GRN+ Het., Sporadic FTLD) showed a decreasing trend in TSG101, Flotillin-1, and CD9 expression in sEVs from *C9orf72* pathological expansion carriers, GRN mutation carriers, and sporadic FTLD patients compared to controls.

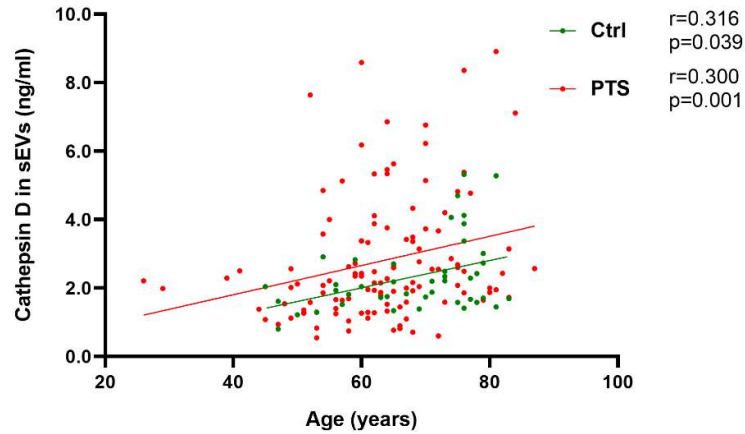

**Figure S2.** Correlation of total cathepsin D in sEVs and age. Correlation of total cathepsin D content in sEVs (ng/ml, not normalized values) with age in controls (Ctrl, in green) and patients (PTS, in red). Age was positively correlated with total cathepsin D in sEVs both in PTS (Spearman  $r=0.316$ ,  $p=0.039$ ) and in Ctrl (Spearman  $r=0.300$ ,  $p=0.001$ ). Spearman correlation  $r$  and  $p$ -values are shown in the panel.

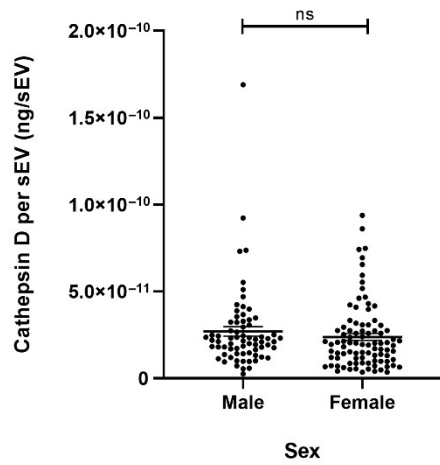

(a)

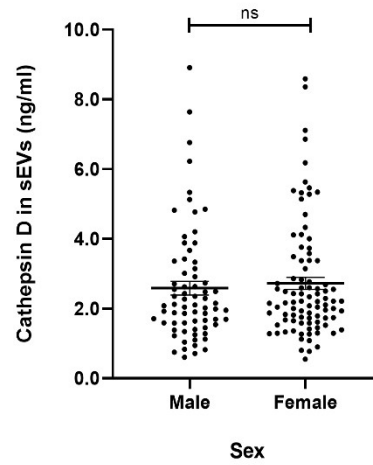

(b)

**Figure S3.** No sex-related differences were observed in sEV cathepsin D levels. (a) Cathepsin D concentration per sEV (ng/sEV) and (b) total cathepsin D in sEVs (ng/ml) differences between male and females ( $p=0.139$  and  $p=0.470$  respectively, Mann-Whitney test).

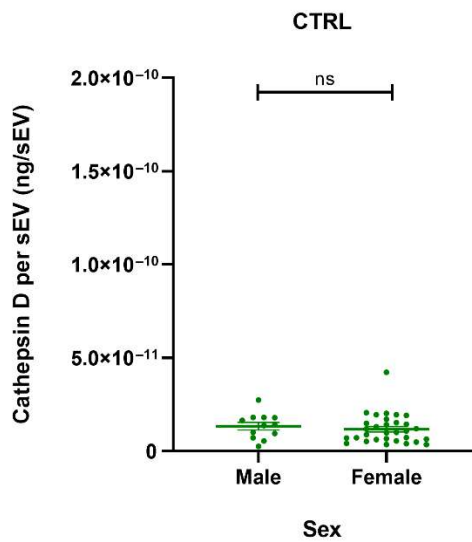

(a)

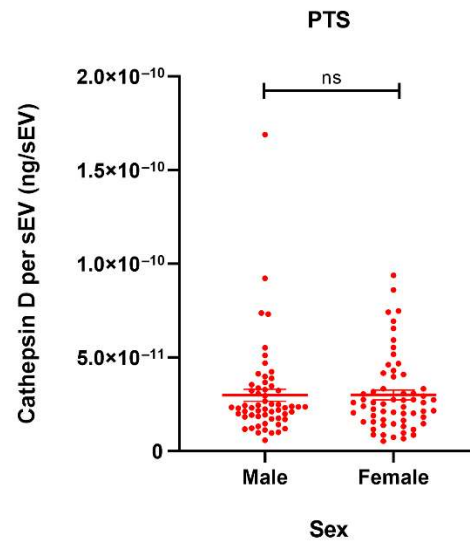

(b)

**Figure S4.** No sex-related differences were observed in Cathepsin D concentration per sEV (ng/sEV) in (a) CTRL and (b) PTS between males and females ( $p=0.543$ , Unpaired t-test and  $p=0.827$ , Mann-Whitney test, respectively).

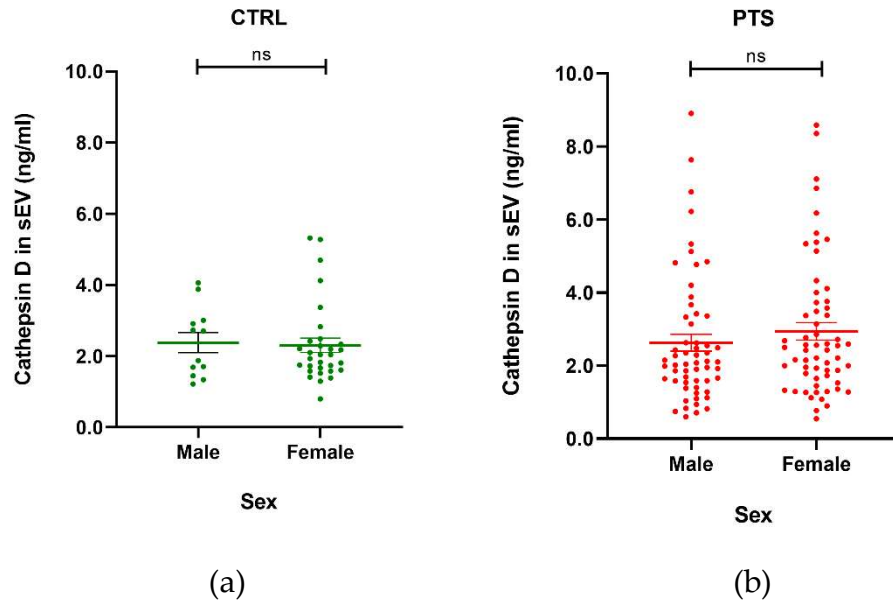

**Figure S5.** No sex-related differences were observed in total cathepsin D in sEVs (ng/ml) in (a) CTRL and (b) PTS between males and females ( $p=0.815$  and  $p=0.208$  respectively, Mann-Whitney test).

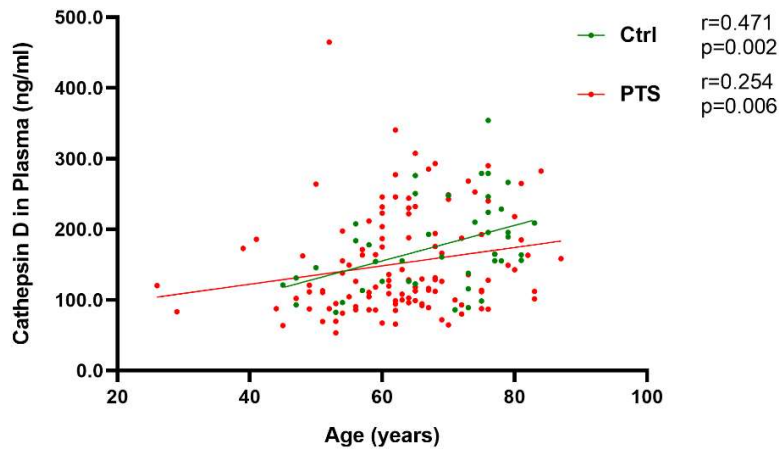

**Figure S6.** Correlation of cathepsin D concentration in plasma and age. Correlation of cathepsin D concentration in plasma (ng/ml) with age in controls (Ctrl, in green) and patients (PTS, in red). Age was positively correlated with plasma cathepsin D both in PTS (Spearman  $r=0.254$ ,  $p=0.006$ ) and in Ctrl (Spearman  $r=0.471$ ,  $p=0.002$ ). Spearman correlation  $r$  and  $p$ -values are shown in the panel.

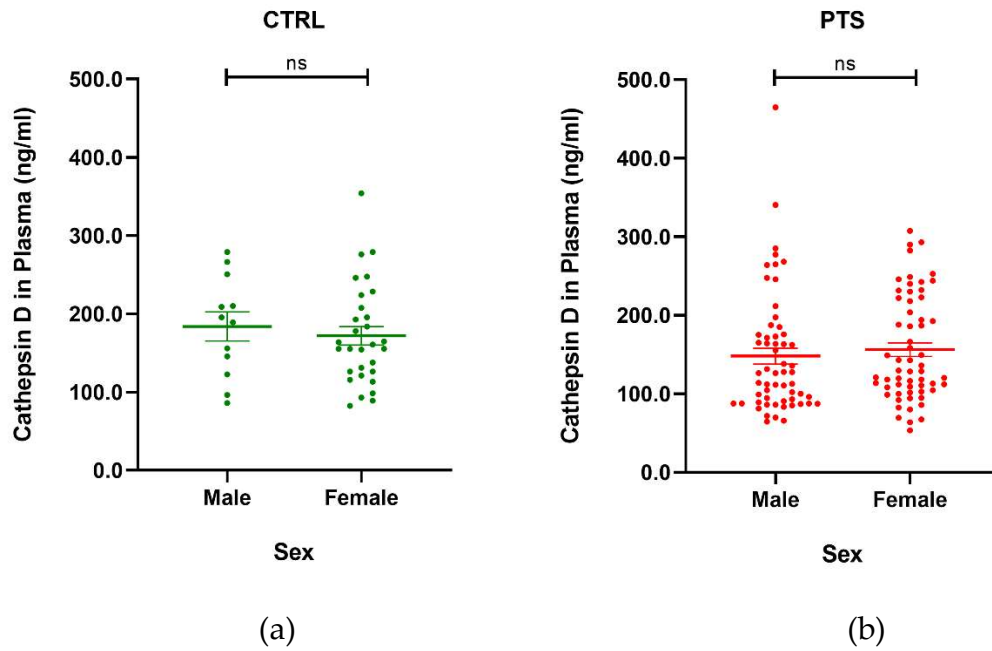

**Figure S7.** No sex-related differences were observed in plasma cathepsin D (ng/ml) in (a) Ctrl and (b) PTS between males and females ( $p=0.587$  and  $p=0.238$  respectively, Mann-Whitney test).

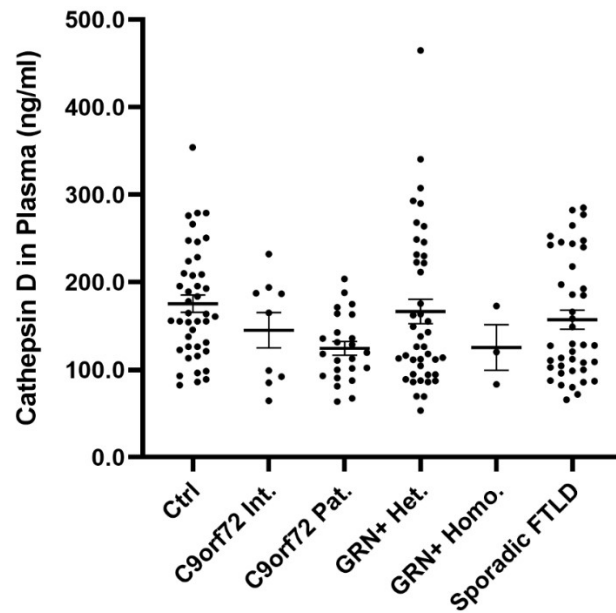

**Figure S8.** Cathepsin D concentration in plasma (ng/ml) in Ctrl, C9orf72 Int., C9orf72 Pat., GRN+ Het., GRN+ Homo., and Sporadic FTL. Mean  $\pm$  SEM. Dot plot represents raw data while the global  $p$ -value ( $p=0.055$ ) was obtained by generalized linear model with inverse gaussian distribution adjusted for age and sex.

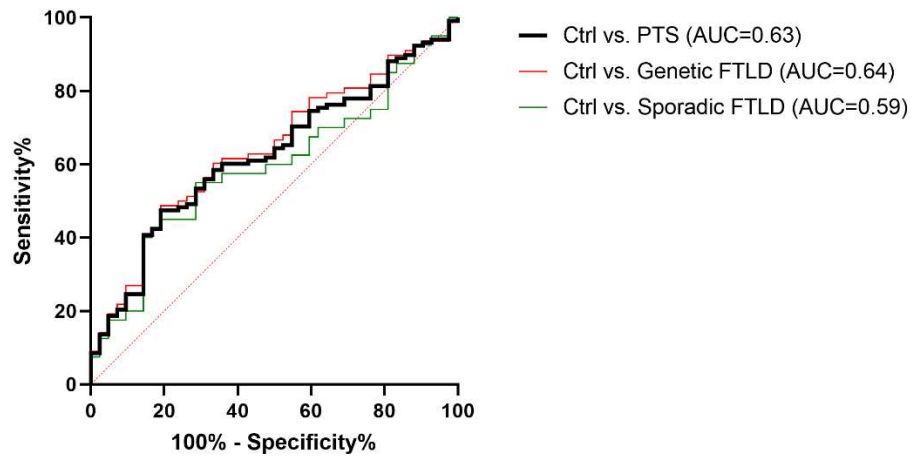

**Figure S9.** ROC curves for plasma cathepsin D. Plasma cathepsin D concentration was used to evaluate the discrimination of PTS from Ctrl. AUC Ctrl vs PTS 0.63 (black); AUC Ctrl vs Genetic FTLD 0.64 (red); AUC Ctrl vs Sporadic FTLD 0.59 (green). AUC comparison with DeLong test,  $p=0.565$ .
